# Supplementary material
Source: MDPI journal article supplement (https://www.mdpi.com/2075-4418/07/3/38)

Figure S1: Salivary concentrations of the 25 measured compounds.

Adhesion

A)

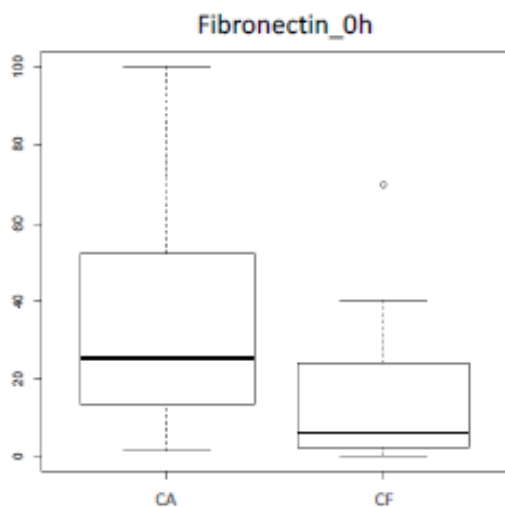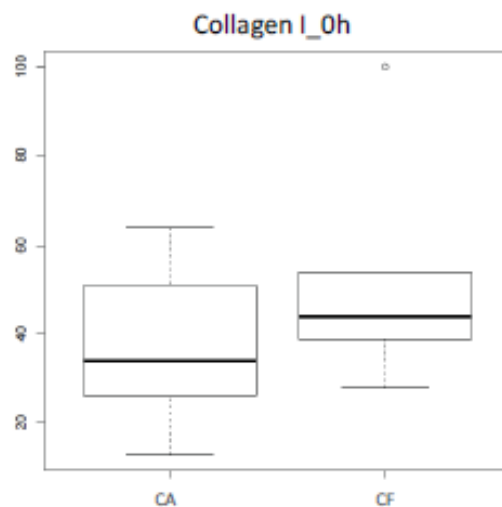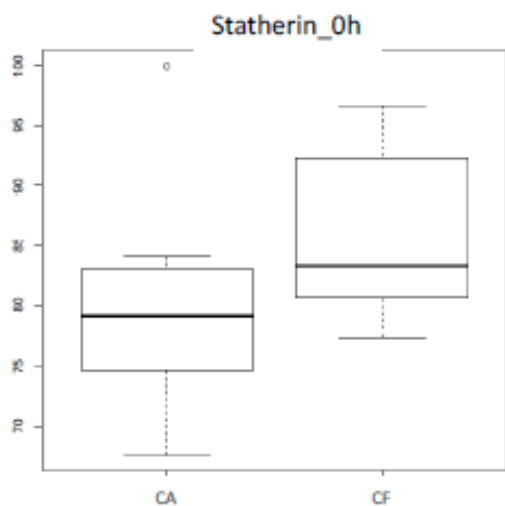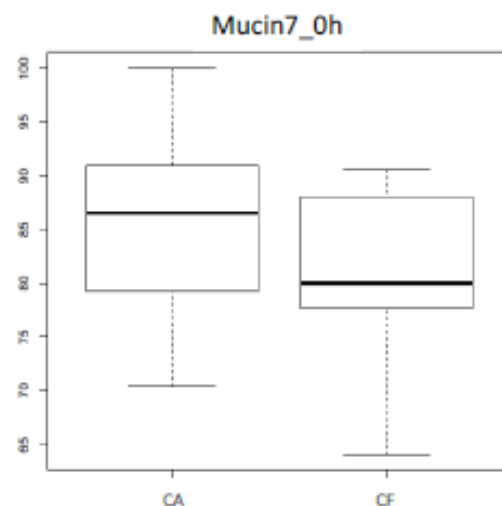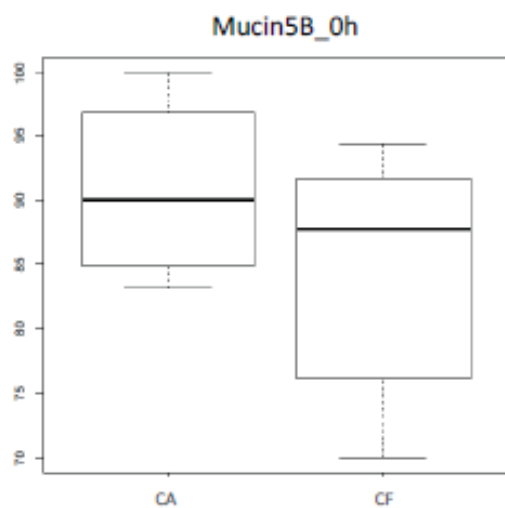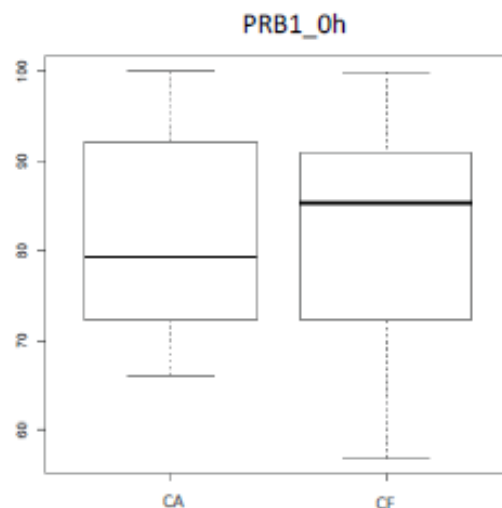

Alpha 2 Macroglobulin\_0h

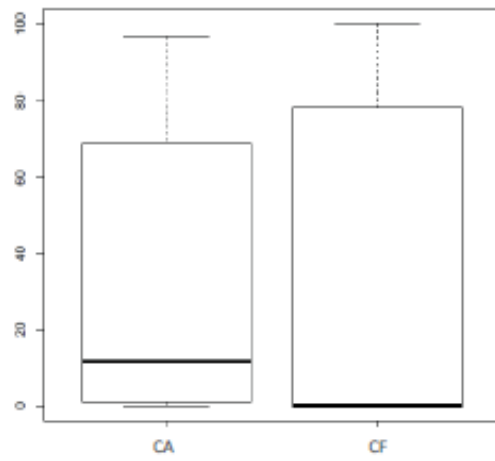

B)

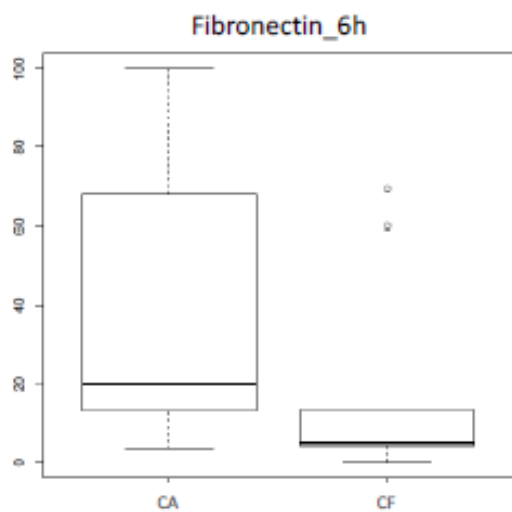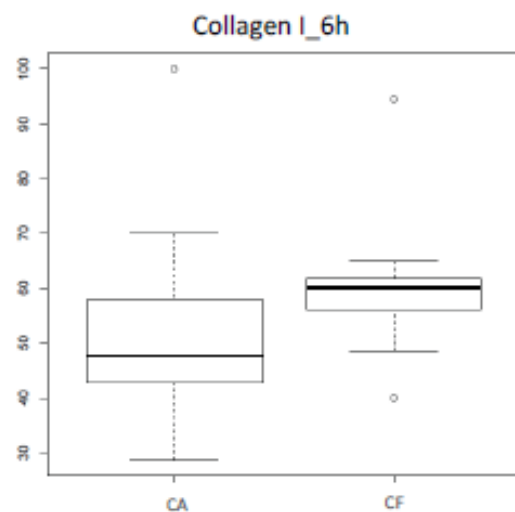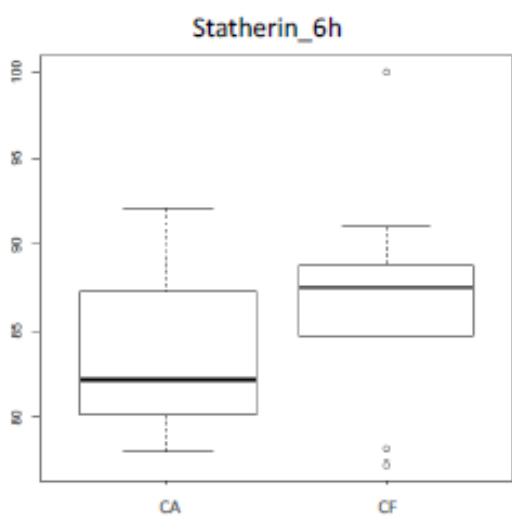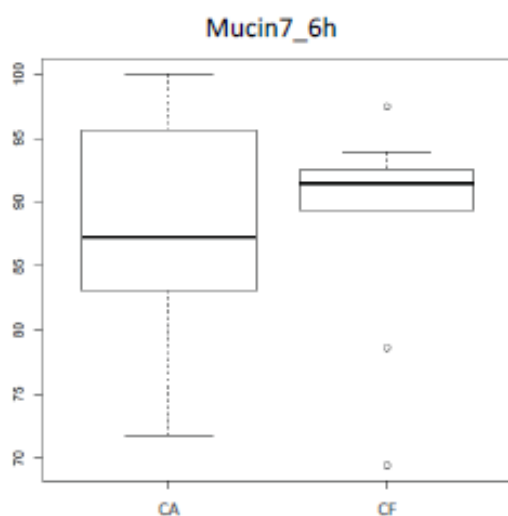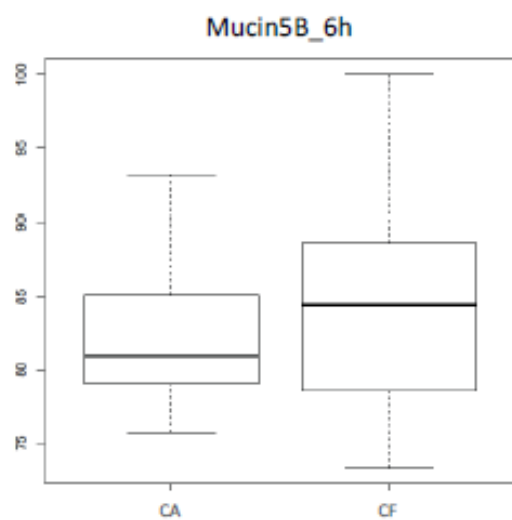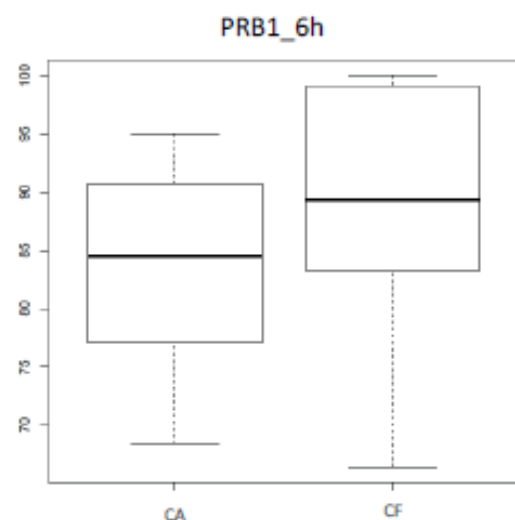

Alpha 2 Macroglobulin\_6h

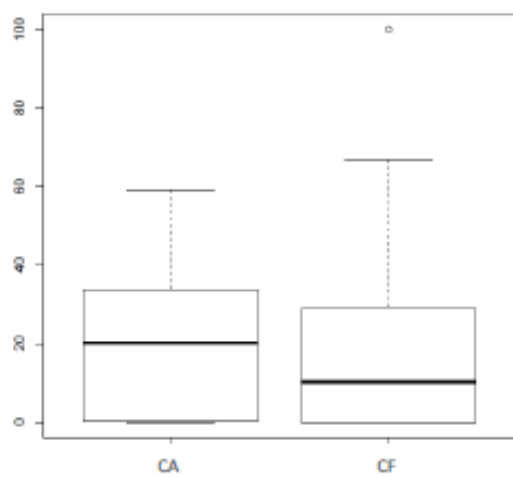

c)

pH

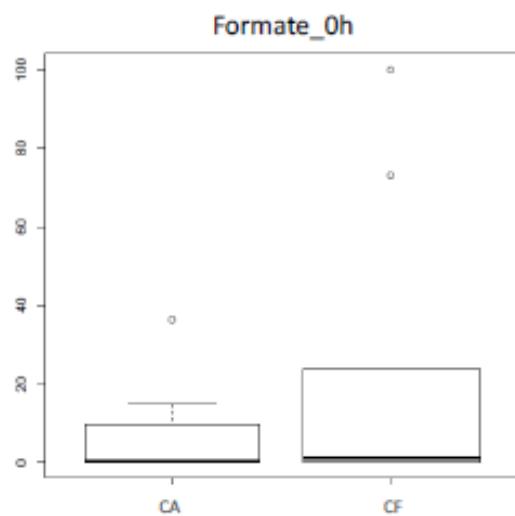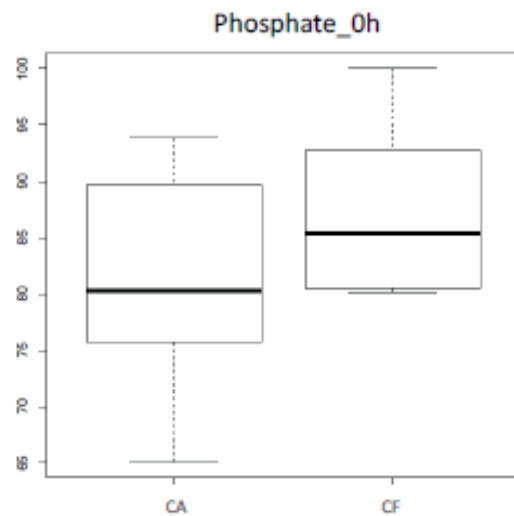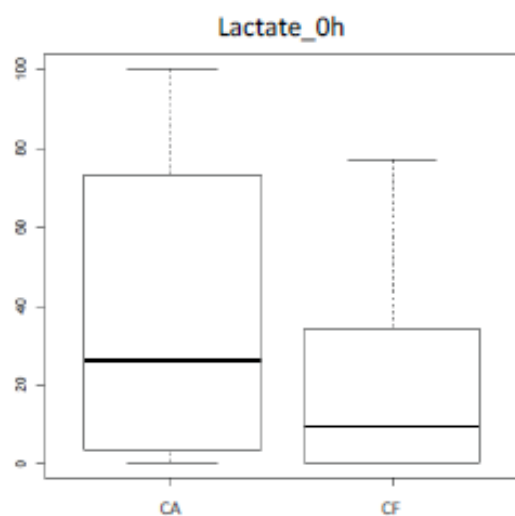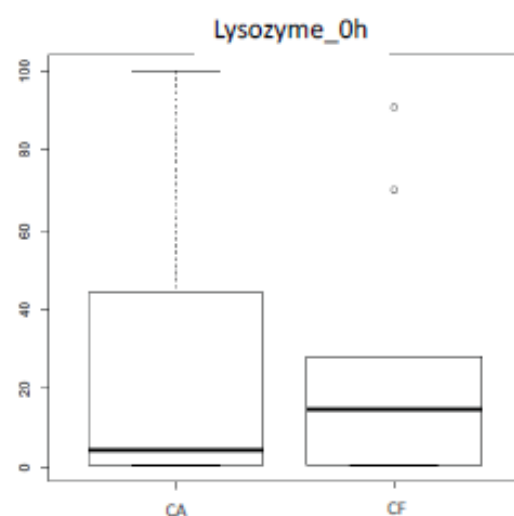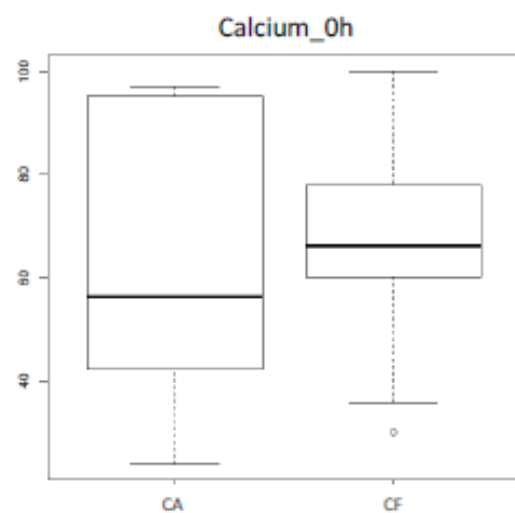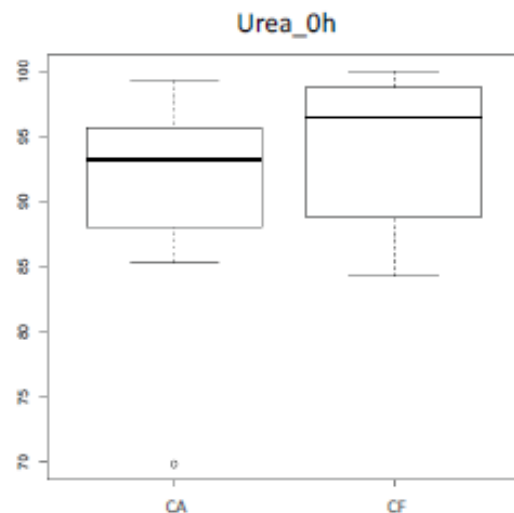

D)

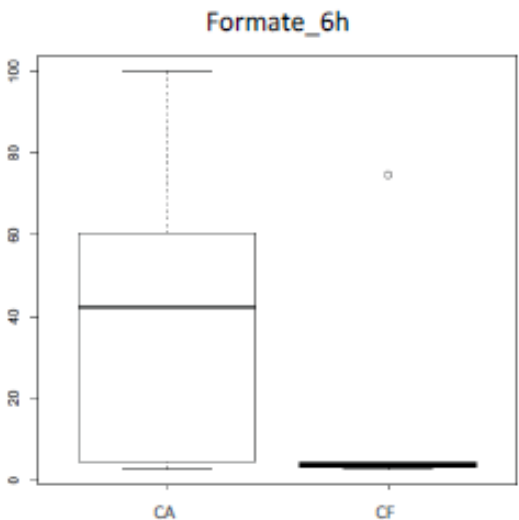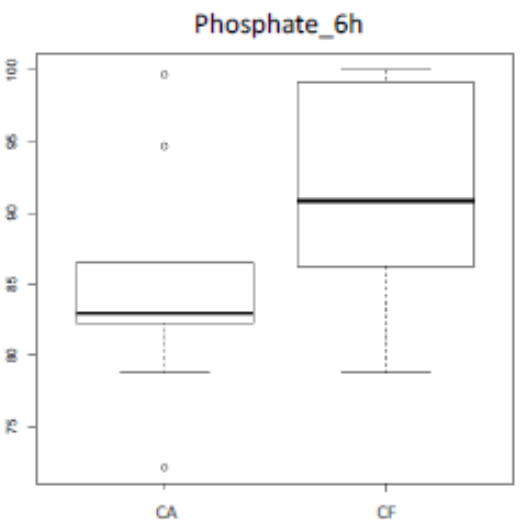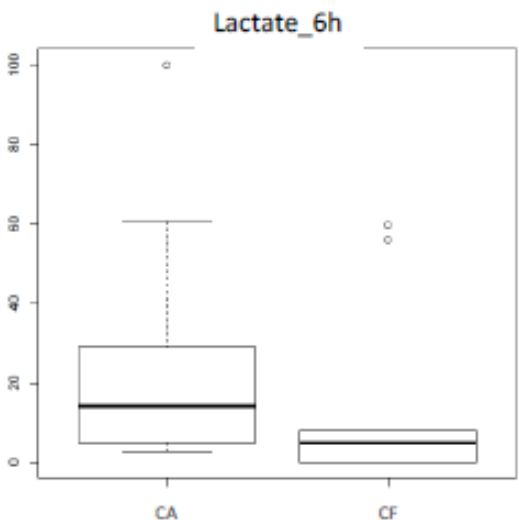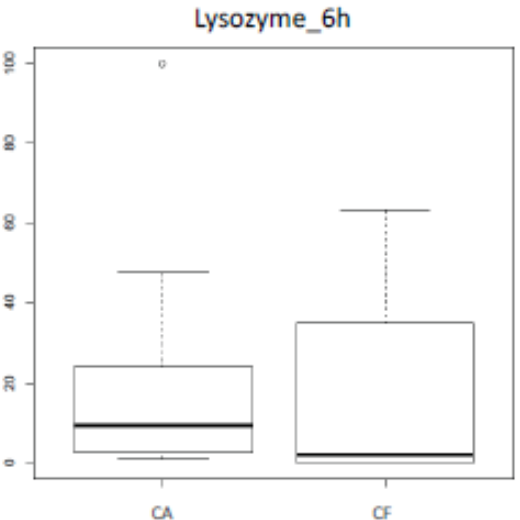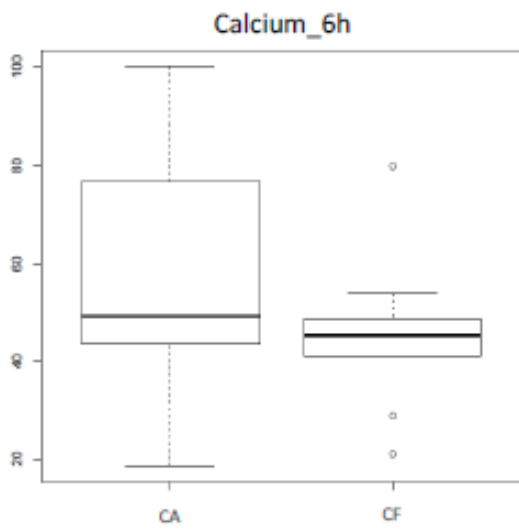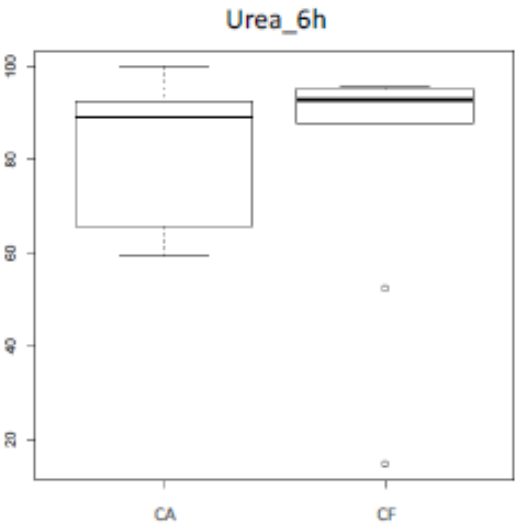

E)

## Immune System

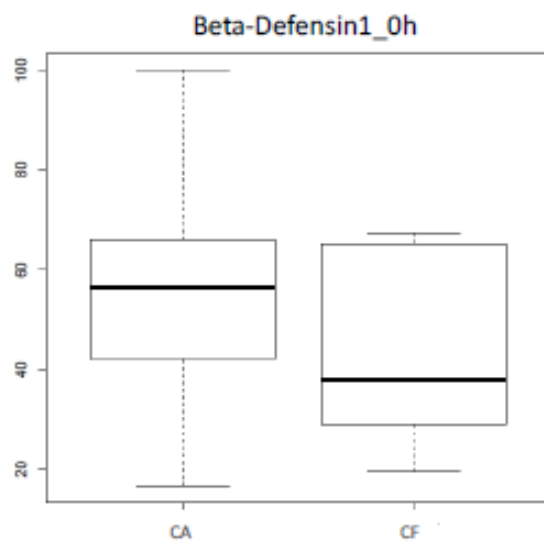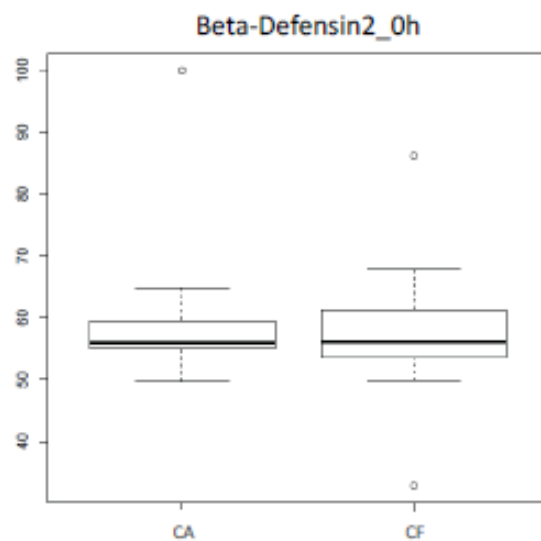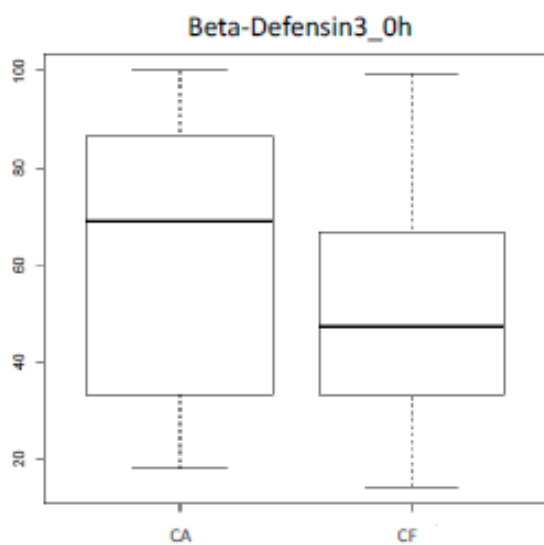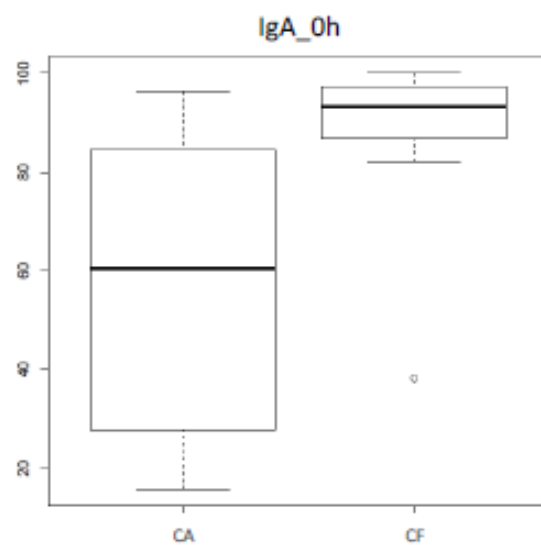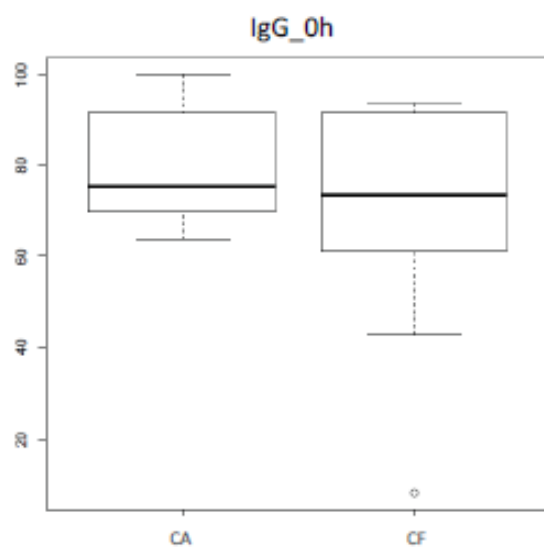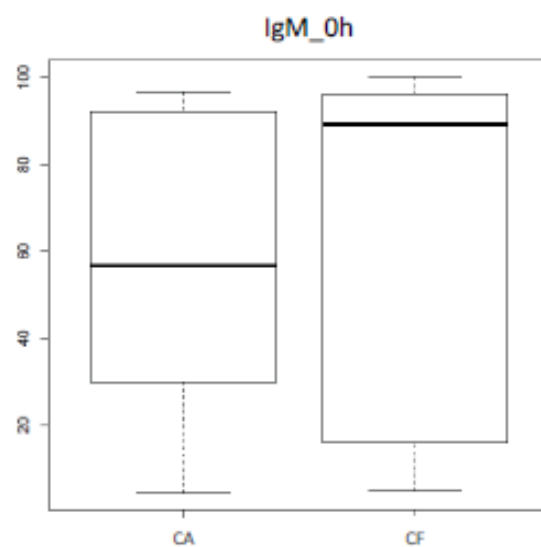

LL37\_0h

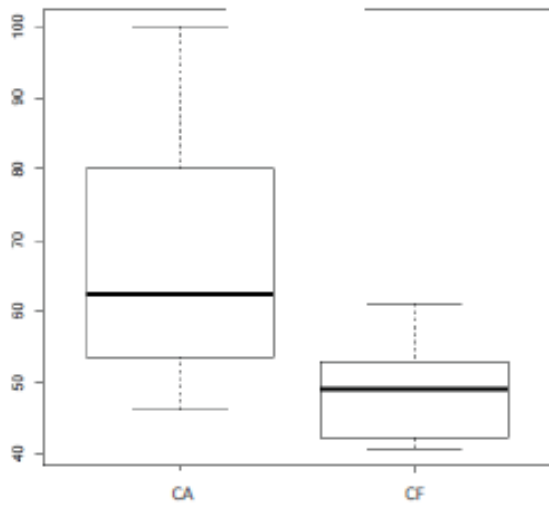

c3a\_0h

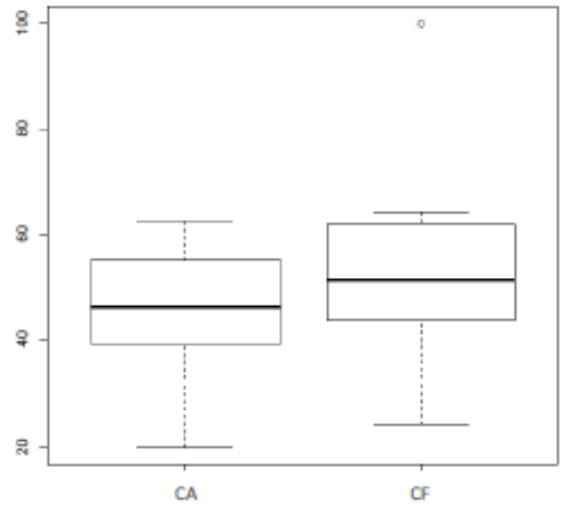

Calprotectin\_0h

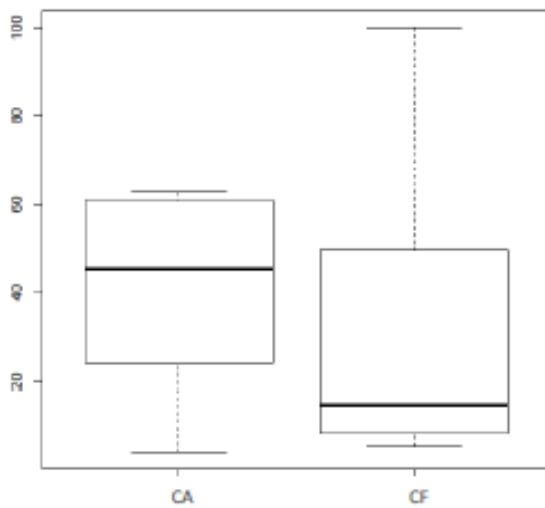

Lactoferrin\_0h

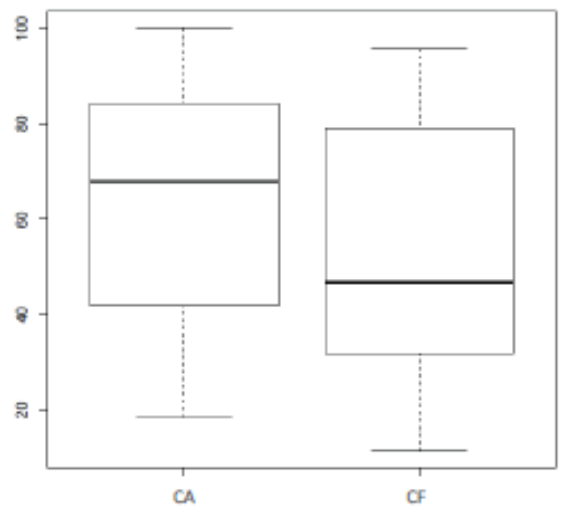

Alpha-Defensin1-3\_0h

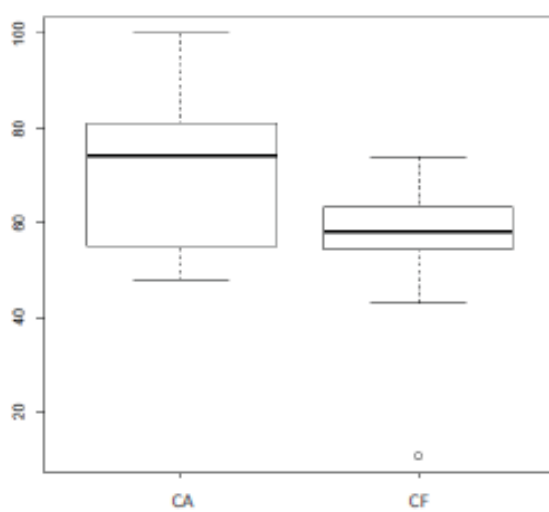



F)

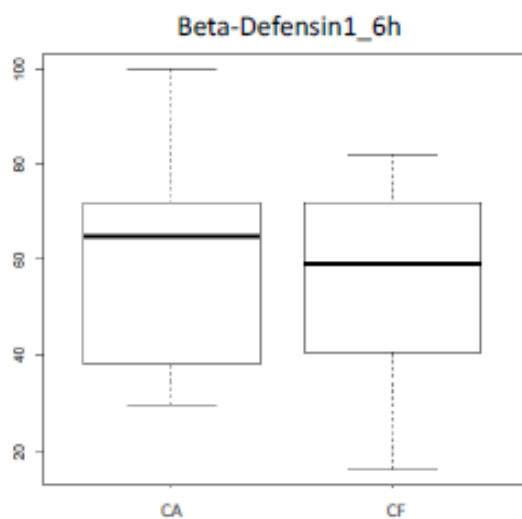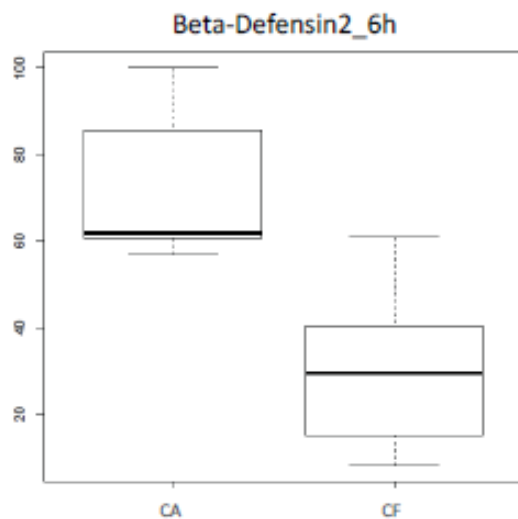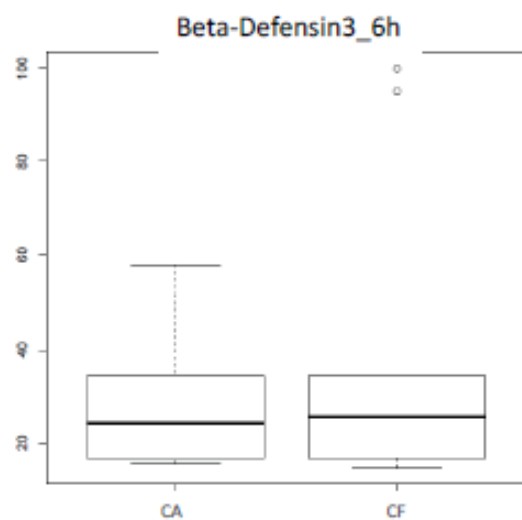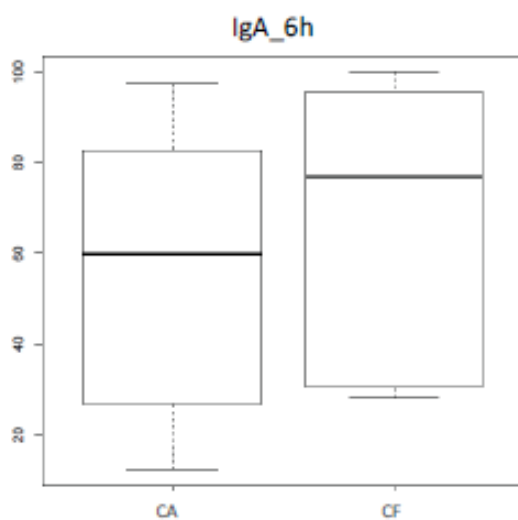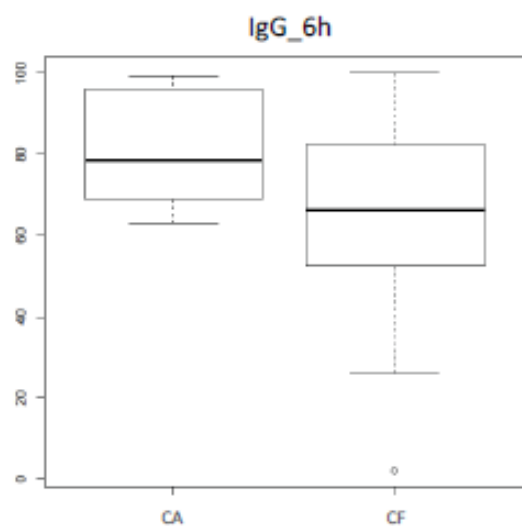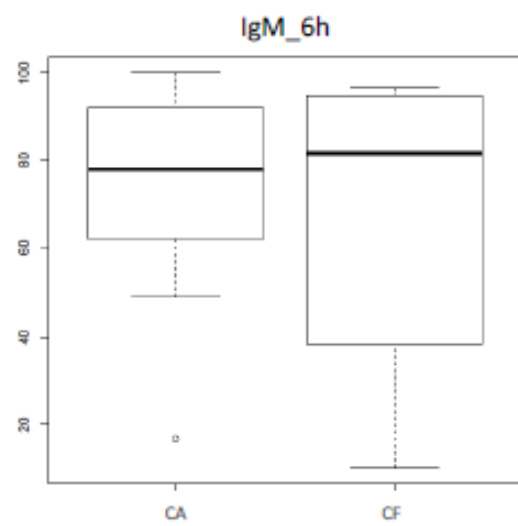

LL37\_6h

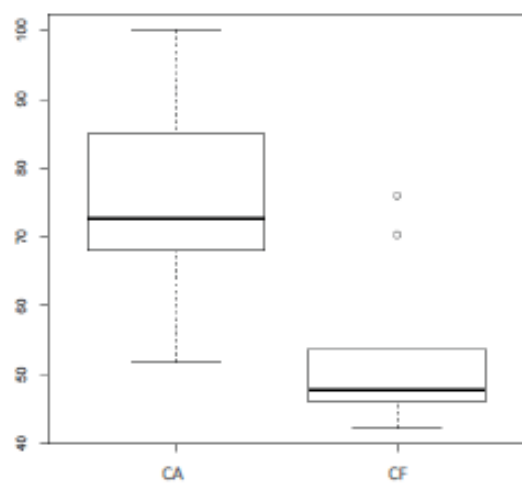

c3a\_6h

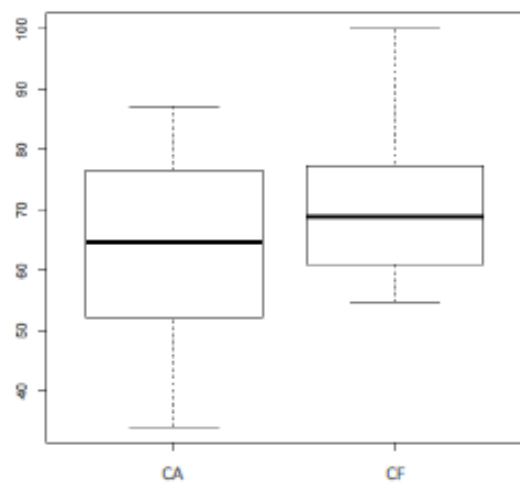

Calprotectin\_6h

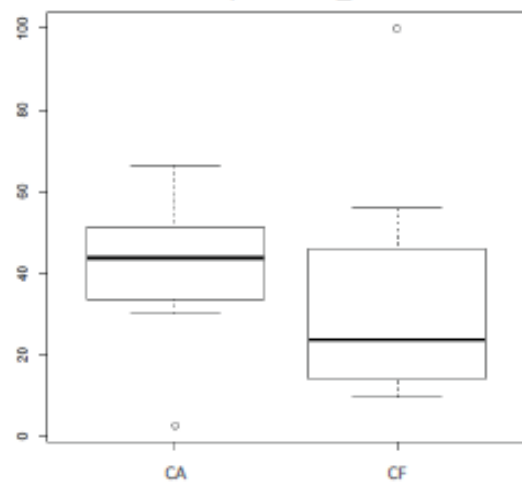

Lactoferrin\_6h

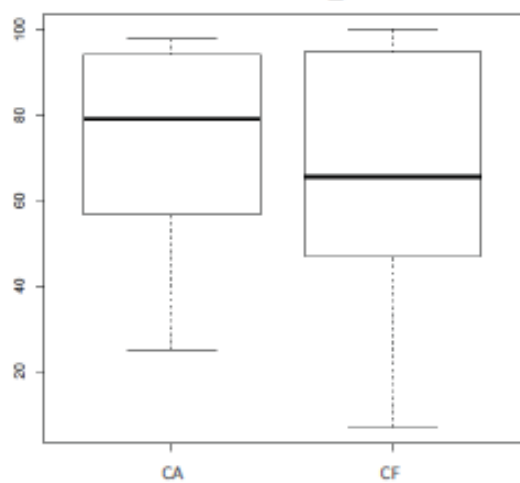

Alpha-Defensin1-3\_6h

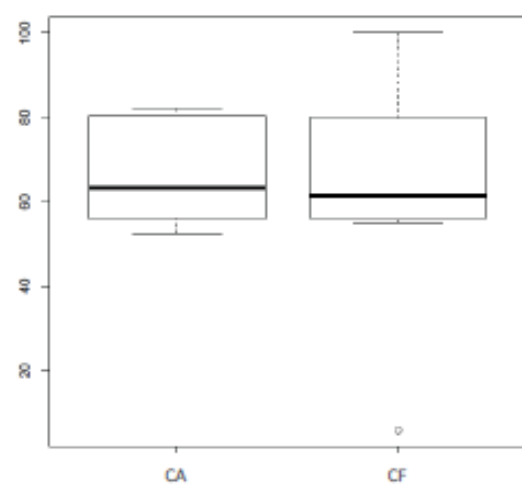

Supplement: s1 [file s1]
