# Supplementary material
Source: MDPI journal article supplement (https://www.mdpi.com/2075-4418/07/3/38)
Supplement: s1 [file s1]

**Supplementary Table S1.** Clinical characteristics of studied patients.

| Sample    | Sex    | Age | OHI <sup>1</sup> | GI <sup>2</sup> | Decayed | Filled | Missing |
|-----------|--------|-----|------------------|-----------------|---------|--------|---------|
| NOCA.TV01 | Male   | 24  | 0                | 1               | 0       | 0      | 0       |
| NOCA.TV02 | Male   | 39  | 0                | 0               | 0       | 0      | 0       |
| NOCA.TV04 | Male   | 25  | 0                | 1               | 0       | 0      | 0       |
| NOCA.TV05 | Female | 27  | 0                | 0               | 0       | 0      | 0       |
| NOCA.TV13 | Male   | 26  | 0                | 1               | 0       | 0      | 0       |
| NOCA.TV07 | Male   | 19  | 3                | 2               | 0       | 0      | 0       |
| NOCA.TV08 | Female | 31  | 1                | 0               | 0       | 0      | 0       |
| NOCA.TV09 | Male   | 29  | 1                | 0               | 0       | 0      | 0       |
| NOCA.TV10 | Female | 39  | 1                | 0               | 0       | 0      | 0       |
| NOCA.TV11 | Male   | 37  | 2                | 1               | 0       | 0      | 0       |
| CATV.02   | Male   | 29  | 0                | 0               | 1       | 6      | 0       |
| CATV.01   | Male   | 34  | 0                | 0               | 3       | 5      | 0       |
| CATV.04   | Female | 25  | 0                | 0               | 3       | 0      | 0       |
| CATV.05   | Male   | 38  | 1                | 1               | 5       | 14     | 0       |
| CATV.06   | Male   | 33  | 1                | 1               | 4       | 0      | 0       |
| CATV.03   | Male   | 37  | 1                | 1               | 1       | 4      | 0       |
| CATV.08   | Female | 30  | 0                | 0               | 3       | 12     | 0       |
| CATV.09   | Female | 27  | 1                | 1               | 2       | 2      | 4*      |
| CATV.10   | Female | 25  | 0                | 0               | 8       | 8      | 0       |
| CATV.07   | Male   | 27  | 3                | 3               | 9       | 12     | 0       |

<sup>1</sup> Oral Hygiene Index: 0.- No visible plaque. 1.- No visible plaque, but adheres to probe. 2.- Low to moderate thickness plaque. 3.- Thick and abundant plaque

<sup>2</sup> Gingival Index: 0.- Healthy. 1.- Mild inflammation. 2.- Redness and/or induced bleeding. 3.- Spontaneous bleeding

\*removed for orthodontic reasons
